# Supplementary material
Source: PubMed Central journal article supplement (PMC2814498)
Supplement: tpc.109.072363_1.pdf [file tpc.109.072363_1.pdf]

Supplemental Data. Liebming et al. (2009). Class I  $\alpha$ -mannosidases are required for N-glycan processing and root development in *Arabidopsis thaliana*.

A

```

At MNS3   : -MSKSLPYSVKDIH-----YDNAK-FRHRSPKLVFSQS-----LSTKRNYSACSTGKFLILLIFGVACLMLM : 64
Hs ERMNSI : MYPPPPPPPHRDFISVTLSPGSEYDNSKSWRRRSCWRKWKQLSRLQRMFLFLAFLFLCGLLFYINLADHWKALAFRLE : 80
Sc MNS1   : -----MKNSE-----VGLSIATIVAIITAIYVVPWYEHBERKSPGAG : 36

At MNS3   : SKS---PNESGLNEKGKVTTFVGLRLGG-----LLRKPPRLPPRLSP---DEGQLRGSSTNGSTIS-- : 119
Hs ERMNSI : EEQKMRPEIAGLKPANPPVLPAPQKADTDPENLPEISSQKTQRHIQRGPPHLQIRPPSQDLKDGTEATKRQEAQVDPDR : 160
Sc MNS1   : EMR----- : 39

At MNS3   : -NSDPK-----WAARQOSVKEAFDHWAGVRYRYAMCYDELME : 155
Hs ERMNSI : PEGDPQRAVISWRGAVIEPEQGTLPVRRAEVPTKPLPAPARTQGTVPVHLNRYRQGVIVDFLHAWKGYRFAWCHDELKE : 240
Sc MNS1   : -----DRLESMLLESWRDLKSHGWGYDVG : 65

At MNS3   : ISQK---GVDGLGGLGATVVDAEDTAMIMG-----LDNIVSEAGSNVETHLERISQKGVNLFETTRIVLGLLSS : 223
Hs ERMNSI : VSR---FSEWFG-LGLTLIDALDTMWILG-----LRKEFEARKVVSKKL--HFVKDQVNLFFESTIRILGLLSS : 305
Sc MNS1   : HEHTSHNMPRGNQFLGWIIVDSVDTLMLMYSSTLYKSEFAEIQRSEHWINDVL--DFDIDAENVNPFETTRIMLGLLSS : 143

At MNS3   : AYHLSGGEQGTVMNTHVGPKPVTYLNIAKGLADRLLSAFTSSPTLPVFFCDVILHSTAHAPAG--GASSTAEVASVOLF : 301
Hs ERMNSI : AYHLSGDS-----LFLRKAEDFGNRLMFAER-TPSKIPYSDVNIETGVAHPPRWT-SDSIVAEVTSIQLEF : 369
Sc MNS1   : AYHLSDVLEVG-----NKTVYLNKAIIDLGRLALAEALSTOGLIYSSINLHSGQAVKNHADGGASSTAETTLQMEF : 215

At MNS3   : NYSSISGDPKYSSTEAMKVLAKK---TLP-KTEGLVPTIYISPTGDFVGENIR-LGSRGDSYVEYLKIVLQOGAKLNS : 376
Hs ERMNSI : REFSRLTGDKKFQEAQVETQHTH--GLSGKKDGLVPMFINTHSLFTHLGVFTICARADSYVEYLLKQWIOGGKQE-- : 444
Sc MNS1   : KYLAYLTGNRTYWELVBRVVEPYKKNNDLNTYDGLVPIYTFPDTCKEFGASTIR-FGSRGDSFYVEYLLKQYLTHETL-- : 292

At MNS3   : NFTYLHDMYIEAMKGVRHLLVQNSIKGLVFGELPYCSKGEFSPKMDHLVCFPLPCTLALCATKGLTKEQALKE--NLLS : 454
Hs ERMNSI : --TQLLEDYVEATEGVRTHLRHSSESKLTFVGLLAHG---RFSAKMDHLVCFPLPCTLALGVYHGLP----- : 506
Sc MNS1   : ---YYDLVYRKSMEGMMKHLAQSKESSLNVIYIGREQLHGQLSPKMDHLVCFMGLLASGSTEGLSIHEARRRPFPSLS : 368

At MNS3   : FEDLENLKLAEELAKTCFEMYEVTATGLAPEIAYFHTKDYTEGLDGGNKSSMYANDIITKPADRHNLQRPETVESIFV : 534
Hs ERMNSI : ---ASHMELAQEIMETCYQNRQMETGLSPEIVHFN--LYQPGR-----RFVEVKPADRHNLQRPETVESIFV : 571
Sc MNS1   : LERKSDWDLAKGITDTCYQMYQSSSGLAPEIIVVENDGNIKQDQWWRSS----VGFVFKPADRHNLQRPETVESIMFM : 443

At MNS3   : YRITKDKYRDQEWQIFEAIEKYIKVYKSGG----YTSLDDVTEVP-PHRRDKMETFFFGETLKYLKYLLEGGDD-SVIP : 607
Hs ERMNSI : YRVTGDRKYQDWQEWELQSSSRFTRVPSGG----YSSINNVQDPQKPEPRDKMESFFFGETLKYLKYLLEGGDDPNLLS : 646
Sc MNS1   : YHLSHDHRYREWCAEIAATSIFENICVDCNDPKLRRFTSLSDCITLP-TKSNMMSFWLAETLKYLKYLLEGGDDFDL : 519

At MNS3   : KVFENTEAHPLPITRRNT----- : 624
Hs ERMNSI : AYVENTEAHPLPITWTPA----- : 663
Sc MNS1   : KVFENTEAHPLPVLDEEILKSQLTTGWSL : 549

```

**B**

```

Hs MNSIA : MPVGGLLPLFSSPAGVVGGLGGGGRKGS GPAALRLTEKFLVLSAFITLFCGAIFFLPDSSKLLSGVLFHSSPAL : 80
Hs MNSIB : MTPFALLPLSGRRIP-----PLNLGPPSPFPHHRATLRLSEKFIILLLSAFITLFCGAIFFLPDSSSKHXR-FDLGLDEDVL : 74
Hs MNSIC : -----MLMRKVP-----GFVPASPWGLRLPQKFLFLFLSGLVTLFCGALFLLPHSSRLKRLFLAPRTQQP : 61
At MNS1 : -----MARSRSISG-YGIWKYLNPAYYLRR----PRRLAL : 30
At MNS2 : -----MARNKLVSGSHGIWKYFNPAFYLRR----PRRLAL : 31

Hs MNSIA : QPAADHKPGPGARAEDAEGRRARREEGAPGDPEAALEDNLARIRENHERALREAKETLQKLPPEIQRDILLEKRVVAQD : 160
Hs MNSIB : IPHVDAGKG---AKNPGVFLIHGPDDEHRRHEBEERLRN--KIRADHEKALEEAKELRKSREEIRABIQTEKNRVVQE : 147
Hs MNSIC : GLEVVAEIAGHAPAREQEPPNPAPAAPAGGEDDPSSWAS----PRRRKGGLRRTRPTGPREATAARGNSIPASRPGDE : 137
At MNS1 : LFIVFVSVS-----MLVWDRINLAREHEVEVFLNEE : 62
At MNS2 : LIILFVSVS-----MVVWDRQSLSRDYQFEVSLNEE : 63

Hs MNSIA : QLRDKAPFRGLPPVDFVPPFVGVESREPAD--AAIREKRAKIKEMMKHAWNNYKGYAWGLNELKPIISKGSHSSSLFC-NIK : 237
Hs MNSIB : MKIKEN--KPLPPVPIPNLVGIRGGDPED--NDIREKREKIKEMMKHAWNNYRTYGWGNELRPIARKGHSNPIFGSSQM : 223
Hs MNSIC : GVPPRFDFNAFRSRLRHPVIGTRADESQEPQSQVRAQRREKIKEMMQFAWQSYKRYAMCKNELRPLTKDGYEGNMFC-GLS : 216
At MNS1 : VSRLEQMLEELNGGVGNKPIKTLKDAPE--PVDKQRRCVKKBAMIHAWSSYKGYAWGKDELQPRTKDGTDS--FC--GL : 136
At MNS2 : VLRLOQMLEEIKSVTEDEVSNLSLKDVED--PVDQRMCRVKKBAMVHAWSSYKGYAWGKDELQPRTKDGVDS--FC--GL : 137

Hs MNSIA : GATIVDALDTLFLMELKHEEKEEAKSWVEENLDFNVNAEISVFEVNIIRFVGGLLSAYVLSGEEIFRKKAVELGVKLLPAFH : 317
Hs MNSIB : GATIVDALDTLYIMGLHDEFLDGQRWIEDNLDPSVNSEVSVFEVNIIRFIGGLLAAYVLSGEEIFKIKAVQLABKLLPAFN : 303
Hs MNSIC : GATVIDSLDTLYIMELKEEFOEAKAWGESFHLNVSGEASLFEVNIIRYIGGLSAYVLTGEEVRIKAIIRLGBKLLPAFN : 296
At MNS1 : GATMVDSLDTLYIMGLDEQOKAREWVWASSLDPDKDYAASMFETTRVVGGLLSAYVLSGDKIFLEKAMDIAADRLLPANW : 216
At MNS2 : GATMIDALDTLYIMGLDEQOKAREWVWASSLDPDKDYAASMFETTRVVGGLLSAYVLSGDKIFLEKAMDIAADRLLPANW : 217

Hs MNSIA : TPTGIEWALLNMKSGIGRNWPWASGGSS--LLAEFGTLHLBFFMHLSHLSGNPIFAEKVMNIRTVLNKLEKPGGLYENYINP : 396
Hs MNSIB : TPTGIEWAMVNLKSGVGRNWGWASAGSS--LLAEFGTLHMBFIFLSYLTGLDLYYKVMHTRKLLQKMDRPNGLYENYINP : 382
Hs MNSIC : TPTGIEPKGVVSPKSG--NWGWATAGSS--LLAEFGSLHLEFLLELTELSGNQVFAEKVRNIRKVLKIEKPFGLYENYINP : 373
At MNS1 : TPTGIEYNIINLRNNAHNPSWAAGGDS--LLADSGTEQLLEFIALSORTGDPKYOQKVERVITELNKNFPADGLLPYINP : 295
At MNS2 : TQSGIYNIINLRNNAHNPTWAGG-DS--LLADSGTEQLLEFIALSORTGDPKYOQKVERVIVISVLNKNFPADGLLPYINP : 295

Hs MNSIA : SSGQWQHHSVSCGLGDSFYEYLLKAWLMSDKTDLA--RKMVFDAVQAETHLIRKSSSGLTYIAEHWKGGLEHKKMGHL : 474
Hs MNSIB : RTGRWQYHTSVSCGLGDSFYEYLLKAWLMSDKTDLA--RKMVDDAEAEKHLIKKSSGGLTFYIAGWKNGLHKKMGHL : 460
Hs MNSIC : VSGNWWQHHSVSCGLGDSFYEYLLKSWLMSGKTDMEA--KNMVEALEAETHYLLNVSPPGGLTYIAEWRGGILDHKKMGHL : 451
At MNS1 : DNANPSYSTTTFEAMGDSFYEYLLKVVVQGNKTSAVKPYEDMWEEKSMKGLLSLVKKSSTPSSFTYIIEKNGNMLDKMDEL : 375
At MNS2 : DTANPSQSTTTFEAMGDSFYEYLLKVVVFGNKTSAVKHYEDMWEEKSMNGLLSLVKKSTPLSFTYIIEKSGNSMLDKMDEL : 375

Hs MNSIA : TCFAGMFLALGADAAP-EGMAQHMLBEGAEIARTCHESVNRTFMKLGPBAFRIDGGVEAIATRQNEKYVILRPEVNETYW : 553
Hs MNSIB : ACFAGMFLALGADGSR-ADKAGHYLBEAEIARTCHESVDRITALKLGPESEFKEDGAVEAVAVRQAEKYVILRPEVLETYW : 539
Hs MNSIC : ACFSGMFLALGAEDAK-EEKRAHYRBLAAQITKTCHESVARSDTKLGPBAFWSNSGREAVATQLSESYVILRPEVNESYM : 530
At MNS1 : ACFAPMLALGASGYG-PDEEKFLSLAELAWTCYNYFQSTPTKLAGENYVFTAGQDMSVG--TSNNILRPEVNESLF : 451
At MNS2 : ACFAPMLALGASGYSDPAEGKKGFLIABELAWTCYNYFQSTPTKLAGENYVFTNSGSDMSVG--TSNNILRPEVNESLF : 452

Hs MNSIA : YMWRLTLDHPKYRKNWAEVAEVALBNHCQVNGGYSGLRDVYLLHESYDDVQSFFLAETLKLYLYLFSDDDLLPHEHNFVNS : 633
Hs MNSIB : YLWRFTHDPRYRQNGWEAALAEIKYCRVNGGFSGLRDVYSSSTPTHDDVQSFFLAETLKLYLYLFSDDDLLPHEHNVFNT : 619
Hs MNSIC : YLWRFQTHNPIYRENGWEVVLALAEKYCTEAGFSGLQDVYSSSTPNHDKQSFFLAETLKLYLYLFSDDDLLSEHNVFNT : 610
At MNS1 : YLWRLTGNKTYQBWGNIFQAFKNSRVESEGYVGLQDVN--TGAKDNKMSQSFFLAETLKLYLYLFSPPSSVISLDEHNVFNT : 529
At MNS2 : YLWRLTGNKTYQBWGNIFAFKNSRVESEGYVGLQDVN--TGAKDNKMSQSFFLAETLKLYLYLFSPTTIVLDEHNVFNT : 530

Hs MNSIA : EAHLLPILPKDK-----KEVEIREE--- : 653
Hs MNSIB : EAHPLPVLHLAN-----TTLSGNPAVR- : 641
Hs MNSIC : EAHPLPVNHSDS-----SGRAWGRH--- : 630
At MNS1 : EAHPLKTVARNR-----PRKPTIALRQRKFGHQINV : 560
At MNS2 : EAHPLKIKSRNDQVNLKQSNKVLRLKPAFRIRQRHYGRITTK : 572

```

**Supplemental Figure 1. Multiple sequence alignment of (A) At MNS3 with human (HsERMNSI) and yeast (ScMNS1) ER-MNSI proteins and (B) MNS1 and MNS2 with human Golgi-MNSIs (HsMNSIA-C).** The sequence alignments were performed with ClustalW (<http://www.ebi.ac.uk/Tools/clustalw2/index.html>) and were edited manually. Conserved amino acid residues are shaded black. Dashed lines represent gaps inserted for optimal alignment of the sequences.

**A**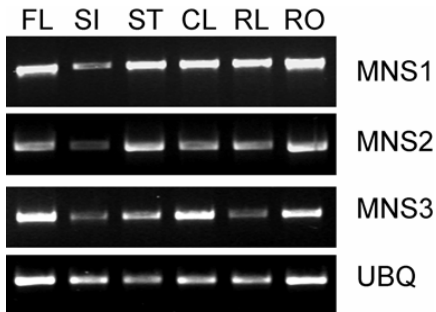**B**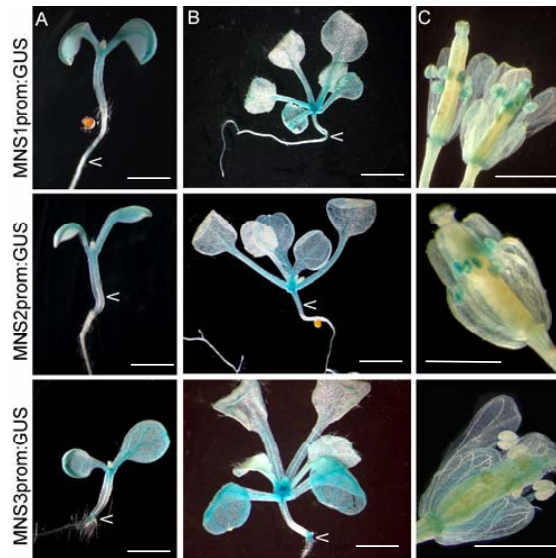**Supplemental Figure 2. Expression of MNS1, MNS2 and MNS3 in *Arabidopsis* tissues.**

(A) Reverse transcriptase-(RT)-PCR (two independent repeats) was performed using RNA extracted from flowers (FL), siliques (SI), stems (ST), cauline leaves (CL), rosette leaves (RL) and roots (RO). Specific primers were used for MNS1 (32 cycles), MNS2 (34 cycles), MNS3 (34 cycles) and UBQ (35 cycles) as control. The expression of the three  $\alpha$ -mannosidase genes was detectable in all analyzed *Arabidopsis* organs, being consistent with a proposed constitutive expression of these genes. (B) Expression of promoter: $\beta$ -glucuronidase (GUS) reporter constructs in *Arabidopsis*. The expression of MNS1<sub>prom</sub>:GUS and MNS2<sub>prom</sub>:GUS is almost indistinguishable, with high expression in pollen grains and shoot apical meristems of seedlings. MNS1<sub>prom</sub>:GUS expression was also detected in hypocotyls and in the upper region of the root in young seedlings. MNS3<sub>prom</sub>:GUS expression is detectable in

stamens and in sepals and in newly emerging rosette leaves. Arrow heads indicate subtle differences in the expression pattern of MNS proteins. Scale bar = 3 mm.

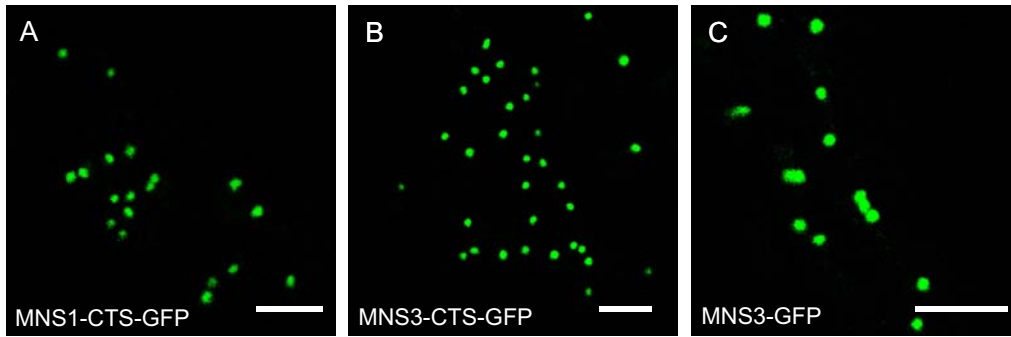

**Supplemental Figure 3. MNS3-GFP is located in the Golgi apparatus of *Arabidopsis* cells.**

*A. thaliana* seedlings expressing (A) MNS1-CTS-GFP, (B) MNS3-CTS-GFP and (C) MNS3-GFP were grown on MS medium plus 2% sucrose for four to seven days at 22°C. Seedlings were transferred onto microscope coverslips and were imaged on a Leica TCP SP2 confocal laser scanning microscope. GFP was imaged using a 488-nm argon laser line, and emission was recorded from 500 to 535 nm. **A-C:** MNS-GFP fusions are located in mobile punctate structures reminiscent of Golgi bodies. No ER labeling was observed. Scale bar = 5 μm.

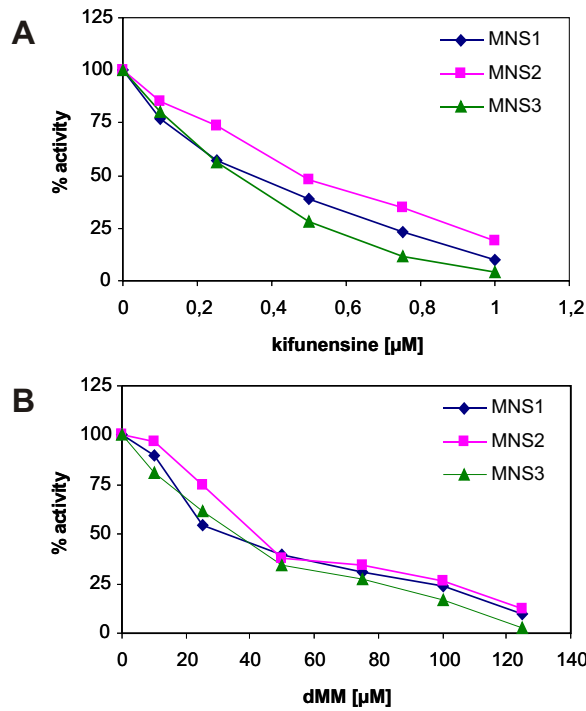

**Supplemental Figure 4. Recombinant MNS proteins are specifically inhibited by kifunensine and 1-deoxymannojirimycin.** Activity assays with methyl-2-O- $\alpha$ -D-mannopyranosyl- $\alpha$ -D-mannopyranoside as substrate were performed as described in Material and Methods. **(A)** Inhibition of MNS1-3 by kifunensine and **(B)** inhibition of MNS1-3 by 1-deoxymannojirimycin (dMM) expressed as a percentage of control activity in the absence of inhibitor.

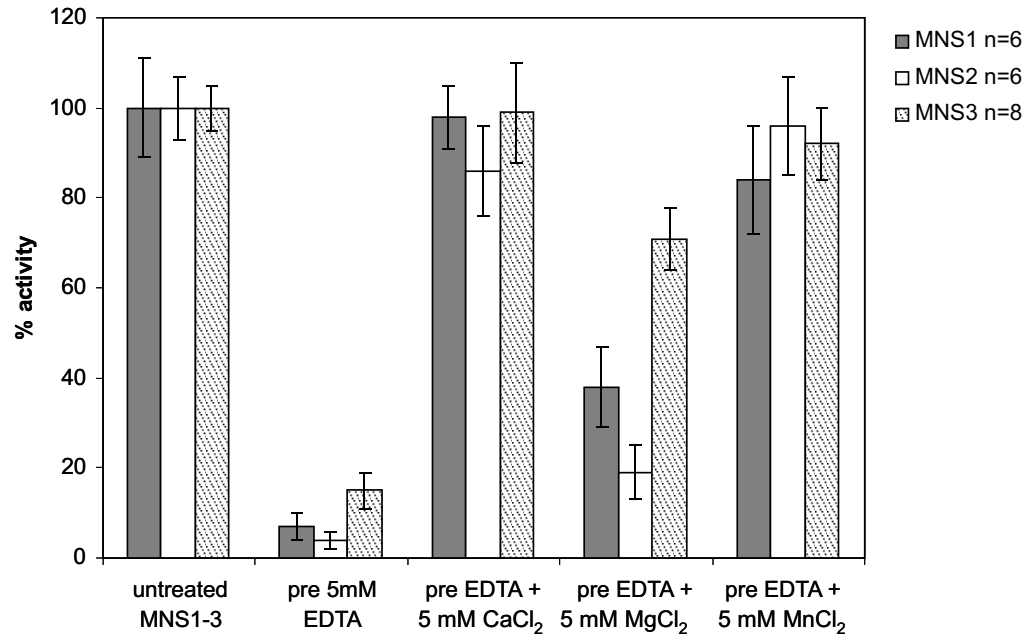

**Supplemental Figure 5. EDTA affects  $\alpha$ -mannosidase activity of recombinant MNS proteins.** After incubation of MNS1-3 with 5 mM EDTA, methyl-2-O- $\alpha$ -D-mannopyranosyl- $\alpha$ -D-mannopyranoside was added. Activity assays were performed as described in Material and Methods. Restoration of enzyme activity was observed after addition of divalent cations.

|                                                                                     |                                                                                     |                                                                                     | Elution position (Glc units)<br>RP-HPLC |
|-------------------------------------------------------------------------------------|-------------------------------------------------------------------------------------|-------------------------------------------------------------------------------------|-----------------------------------------|
| Man <sub>9</sub> GlcNAc <sub>2</sub>                                                | 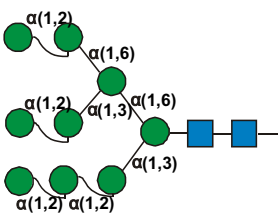   | Man9                                                                                | 5.33                                    |
|                                                                                     |    | Man8.1                                                                              | 4.76                                    |
|                                                                                     |    | Man8.2                                                                              | 6.40                                    |
| Man <sub>8</sub> GlcNAc <sub>2</sub>                                                |    | Man8.4                                                                              | 5.65                                    |
|                                                                                     |  | Man6.1                                                                              | 6.15                                    |
|                                                                                     | Man <sub>6</sub> GlcNAc <sub>2</sub>                                                |  | Man6.8                                  |
|  |                                                                                     | Man6.10                                                                             | 7.82                                    |
| Man <sub>5</sub> GlcNAc <sub>2</sub>                                                |                                                                                     |  | Man5.1                                  |

**Supplemental Figure 6. N-glycan structures relevant for this study.** The elution positions of each oligosaccharide on RP-HPLC are taken from the literature (Tomiya et al., 1991, Neeser et al., 1985).



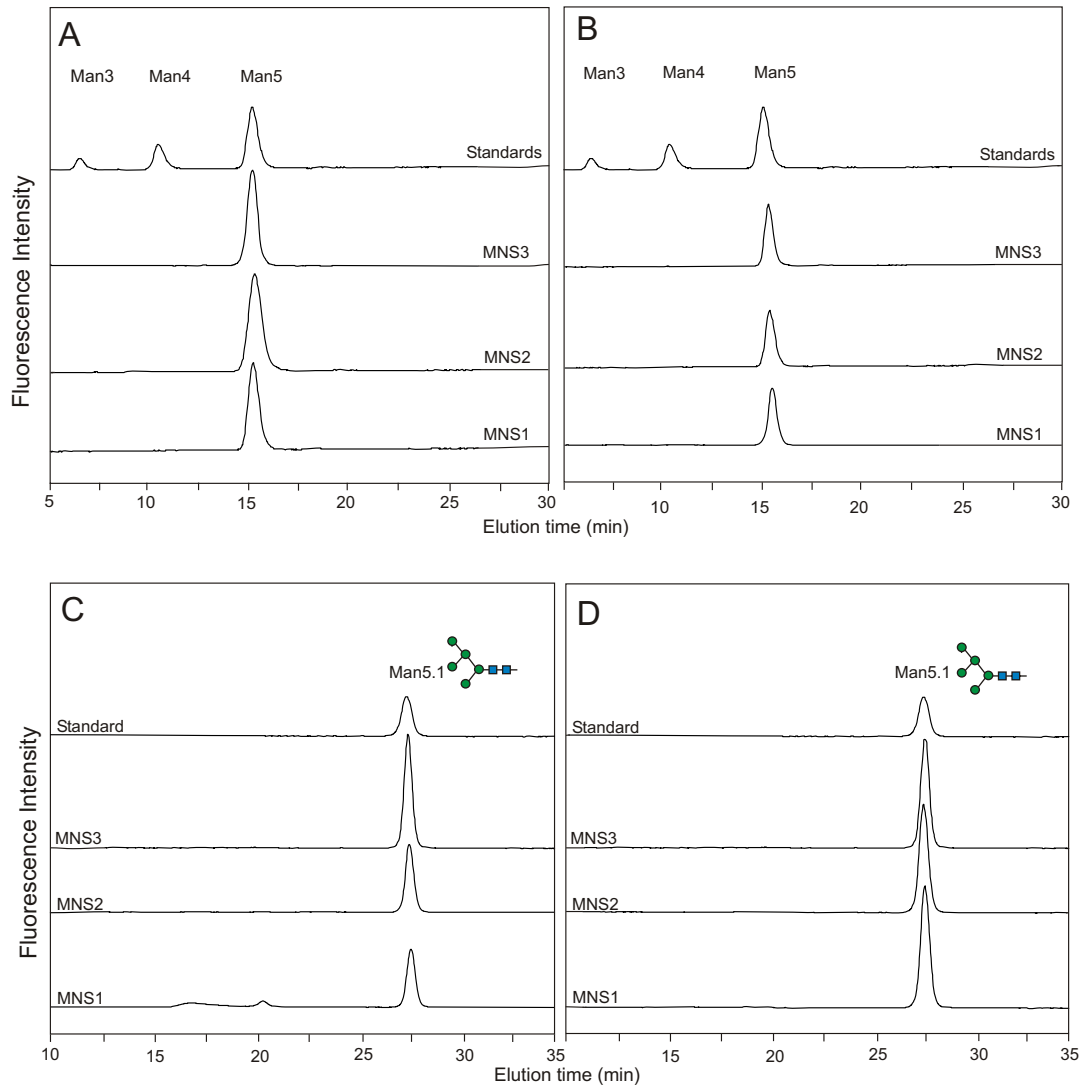

**Supplemental Figure 7. The MNS product Man5-PA co-elutes with Man5.1.**

Incubation of the substrates  $\text{Man}_8\text{GlcNAc}_2\text{-PA}$  (A, C) and  $\text{Man}_9\text{GlcNAc}_2\text{-PA}$  (C, D) with high amounts of the recombinant enzymes MNS1-3 yielded  $\text{Man}_5\text{GlcNAc}_2\text{-PA}$  (A+B) when analyzed on NP-HPLC. No further trimming of mannoses to  $\text{Man}_4\text{GlcNAc}_2\text{-}$  or  $\text{Man}_3\text{GlcNAc}_2\text{-PA}$  occurred.  $\text{Man}_5\text{GlcNAc}_2\text{-PA}$  peaks were collected and separated on RP-HPLC (C+D). All Man5-PA products co-elute with the Man5.1 standard. As other Man5 isomers were shown to have different elution times (Tomoya et al., 1991), this indicates that Man5.1 is the only isomer generated by recombinant MNS proteins.

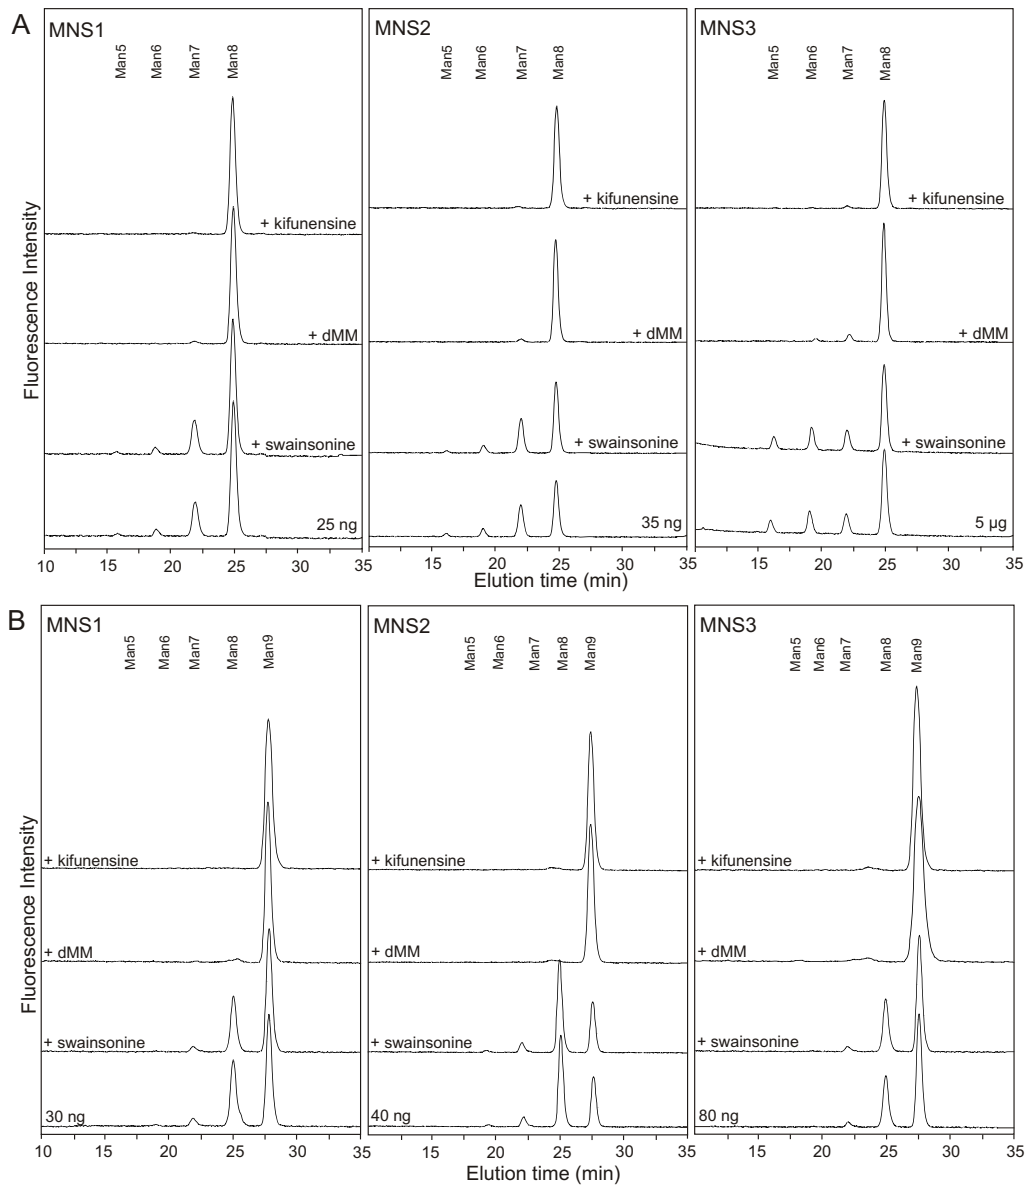

**Supplemental Figure 8. Recombinant MNS proteins are specifically inhibited by kifunensine and 1-deoxymannojirimycin.**

Activity assays with PA-labeled substrates **(A)**  $\text{Man}_8\text{GlcNAc}_2$  and **(B)**  $\text{Man}_9\text{GlcNAc}_2$  were performed in the presence of class I and class II  $\alpha 1,2$ -mannosidase inhibitors. Assays were performed under conditions where at least 30 percent substrate turnover took place. Briefly, after incubation of the enzymes with a certain amount of inhibitors for 15 min on ice, the samples were handled and analyzed as described in Methods. The class II  $\alpha 1,2$ -mannosidase inhibitor swainsonine (10  $\mu\text{M}$ ) did not affect the enzyme activity of MNS1-3. In contrast, hardly any substrate turnover was seen when the recombinant enzymes were pre-incubated with 1-deoxymannojirimycin (dMM, 100  $\mu\text{M}$ ) or kifunensine (1  $\mu\text{M}$ ).

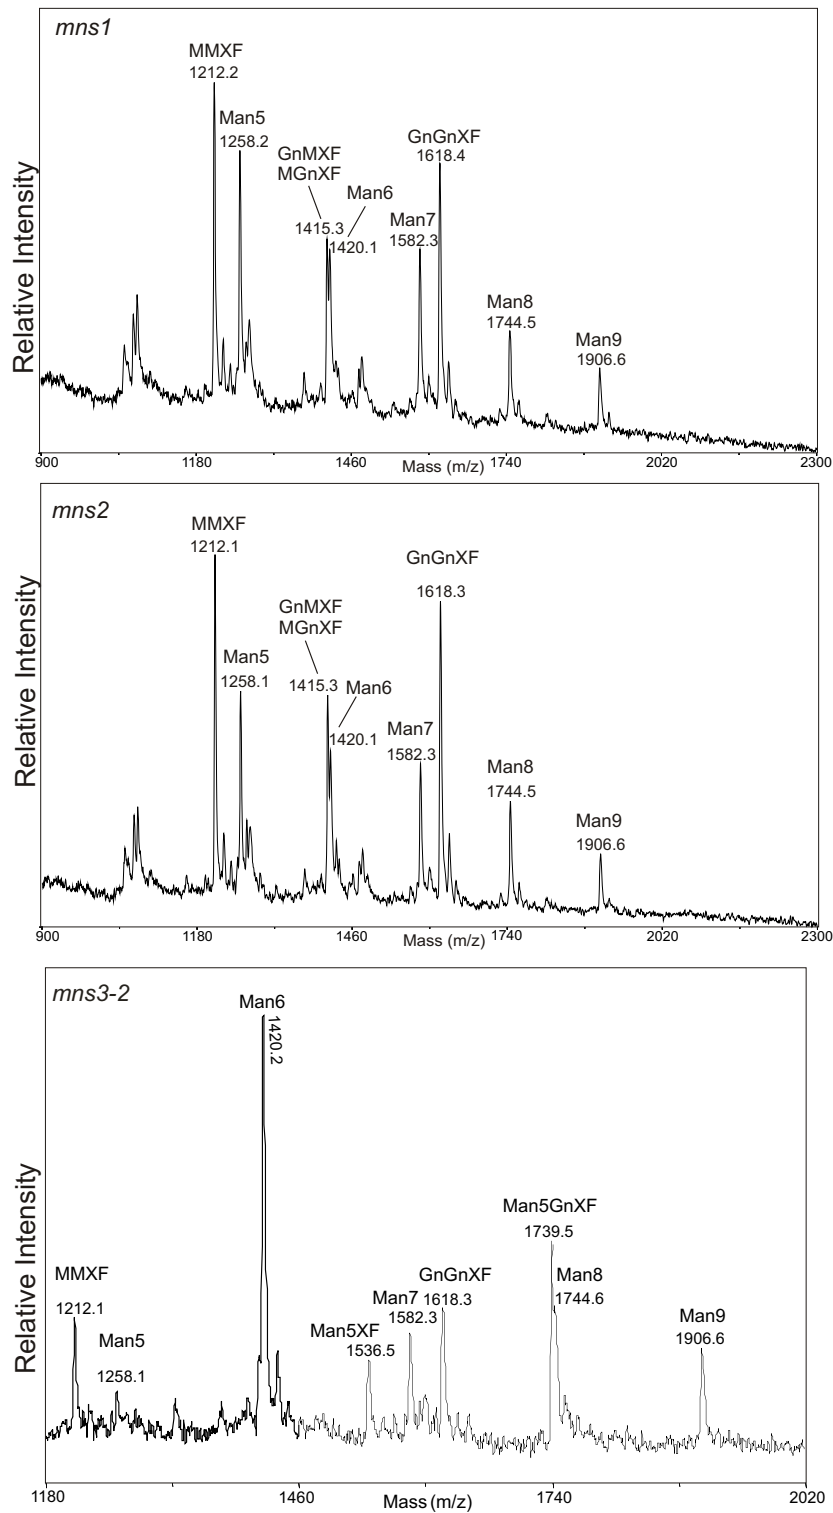

**Supplemental Figure 9. N-glycan spectra of leaves of single knockout plants.** MALDI-TOF-MS spectra of total N-glycans extracted from leaves of *mns1*, *mns2* and *mns3-2* single mutants. The N-glycan profile of *mns3-1* is essentially the same as that of *mns3-2*.

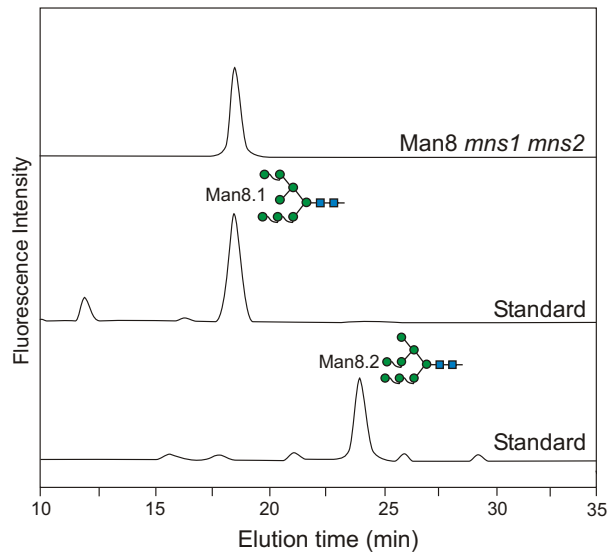

**Supplemental Figure 10. The Man<sub>8</sub>GlcNAc<sub>2</sub> oligosaccharide isolated from glycoprotein extracts of *mns1 mns2* double knockouts co-elutes with Man8.1.**

Leaf material of the double knockout was analyzed for total glycans as described previously (Strasser et al., 2004). The prominent Man<sub>8</sub>GlcNAc<sub>2</sub> peak was isolated by normal-phase HPLC, PA-labeled and analyzed by reverse-phase HPLC. To characterize the isolated peak, two Man<sub>8</sub>GlcNAc<sub>2</sub> isomers (Man8.1, Man8.2) were used as standards. Man<sub>8</sub>GlcNAc<sub>2</sub> isolated from the double mutant co-elutes with the Man8.1-PA standard, the isomer lacking the terminal mannose from the b-branch.

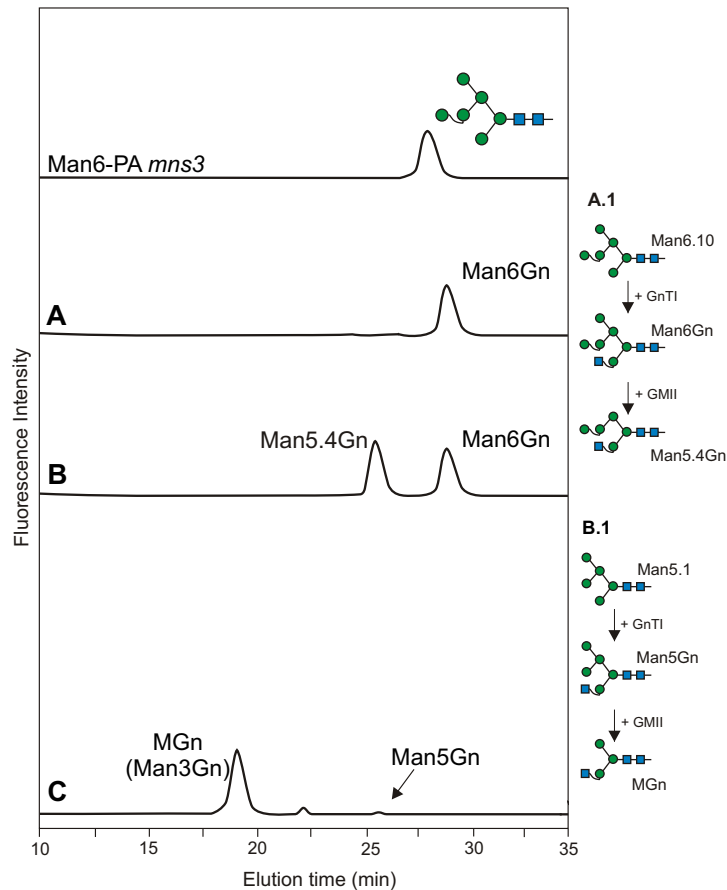

**Supplemental Figure 11. The  $\text{Man}_6\text{GlcNAc}_2$  oligosaccharide isolated from *mns3-1* plants is an acceptor substrate for N-acetylglucosaminyltransferase I (GnTI).**

$\text{Man}_6\text{GlcNAc}_2$ -PA isolated from *mns3-1* plants (presumably  $\text{Man}_{6.10}$ ) was incubated with recombinant rabbit GnTI and UDP-GlcNAc (5 mM) in the presence of 20 mM  $\text{MnCl}_2$  in assay buffer (100 mM MES [pH 6.3], 1 mg/ml BSA, 1.25% Triton-100, 1.25 mM DTT, 6.25  $\mu\text{g/ml}$  E-64, 6.25  $\mu\text{g/ml}$  Leupeptin, 2.5 mM PMSF and 25  $\mu\text{M}$  swainsonine) overnight at 37°C. The reaction was stopped by heating at 95°C for 5 min. The product was analyzed by normal-phase HPLC (trace A) and the collected  $\text{Man}_6\text{Gn}$  peak was incubated with recombinant *Drosophila melanogaster* Golgi  $\alpha$ -mannosidase II (GMII) in 50 mM MES buffer (pH 6.0) and 10  $\mu\text{M}$  2-acetamido-1,2-deoxynojirimycin for 1 h at 37°C. After heating at 95°C for 5 minutes in the presence of 10  $\mu\text{M}$  swainsonine, the sample was again analyzed by normal-phase HPLC (trace B).  $\text{Man}_6\text{Gn}$  was sensitive to Golgi  $\alpha$ -mannosidase II. One mannose residue could be slowly removed resulting in an aberrant  $\text{Man}_5\text{Gn}$ -product ( $\text{Man}_{5.4}\text{Gn}$ ). No further trimming to MGn occurred, as expected. Digestion of  $\text{Man}_5\text{GlcNAc}_2$ -PA ( $\text{Man}_{5.1}$ ) that was treated identically as described above revealed an almost complete removal of two mannose residues resulting in the formation of MGn (trace C).

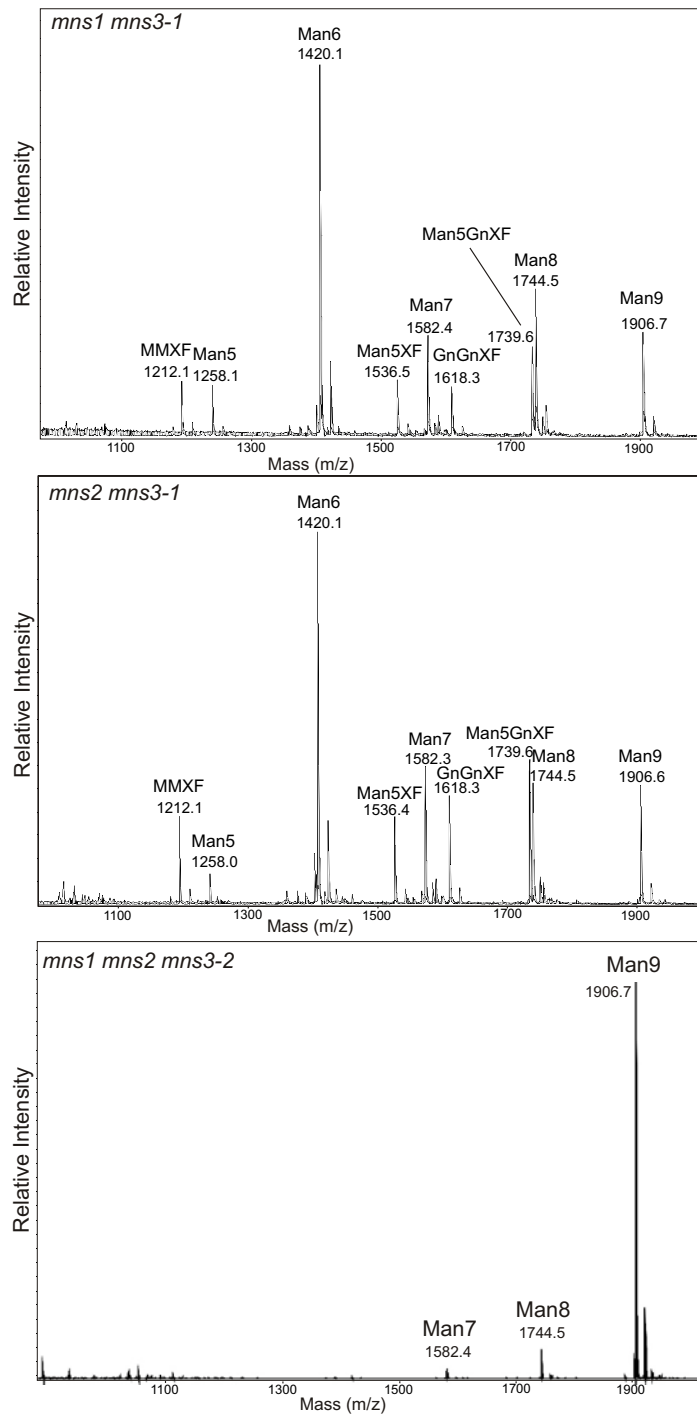

**Supplemental Figure 12. N-glycan spectra of leaves of double and triple knockouts**

**(*mns1 mns3-1*, *mns2 mns3-1*, *mns1 mns2 mns3-2*)**

MALDI-TOF-MS spectra of total N-glycans extracted from leaves of different mutant lines. The N-glycans of *mns1 mns3-1* and *mns2 mns3-1* double mutants are identical to those of the *mns3-1* single mutant (Figure 7A), while *mns1 mns2 mns3-2* shows a predominance of Man<sub>9</sub>GlcNAc<sub>2</sub> as found in *mns1 mns2 mns3-1* (Figure 7A).

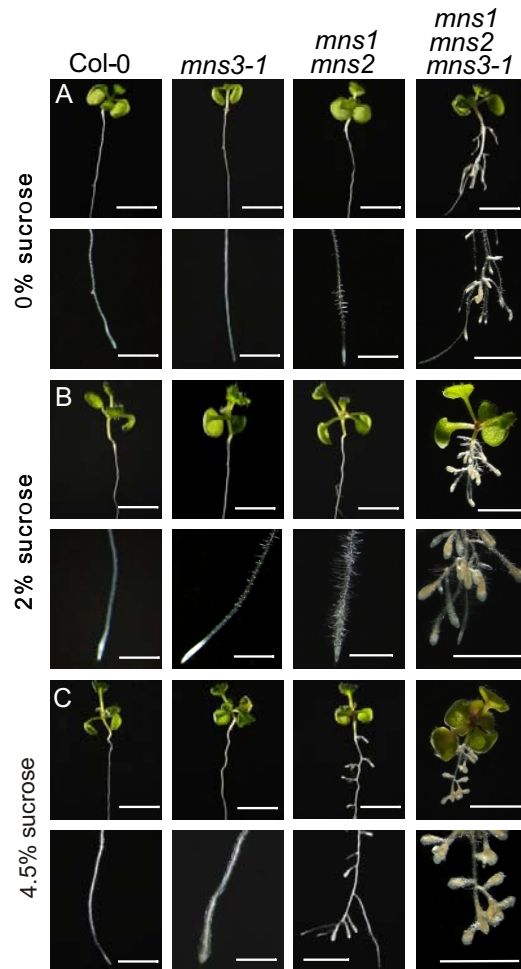

**Supplemental Figure 13. *mns* mutant seedlings are affected by high amounts of sucrose.**

After growth of wild-type (Col-0) and *mns* mutant seedlings on MS agar medium with 2% sucrose for five days at 22°C, seedlings were transferred to MS agar plates with 0% sucrose (A), with 2% sucrose (B) or with 4.5% sucrose (C) and were grown for another six days at 22°C. On plates with 4.5% sucrose, *mns1 mns2* and *mns1 mns2 mns3-1* show a decrease in root length and an increase in radially swollen roots. The *mns3-1* single mutant displays swollen root tips. Scale bar = 5 mm for all images.

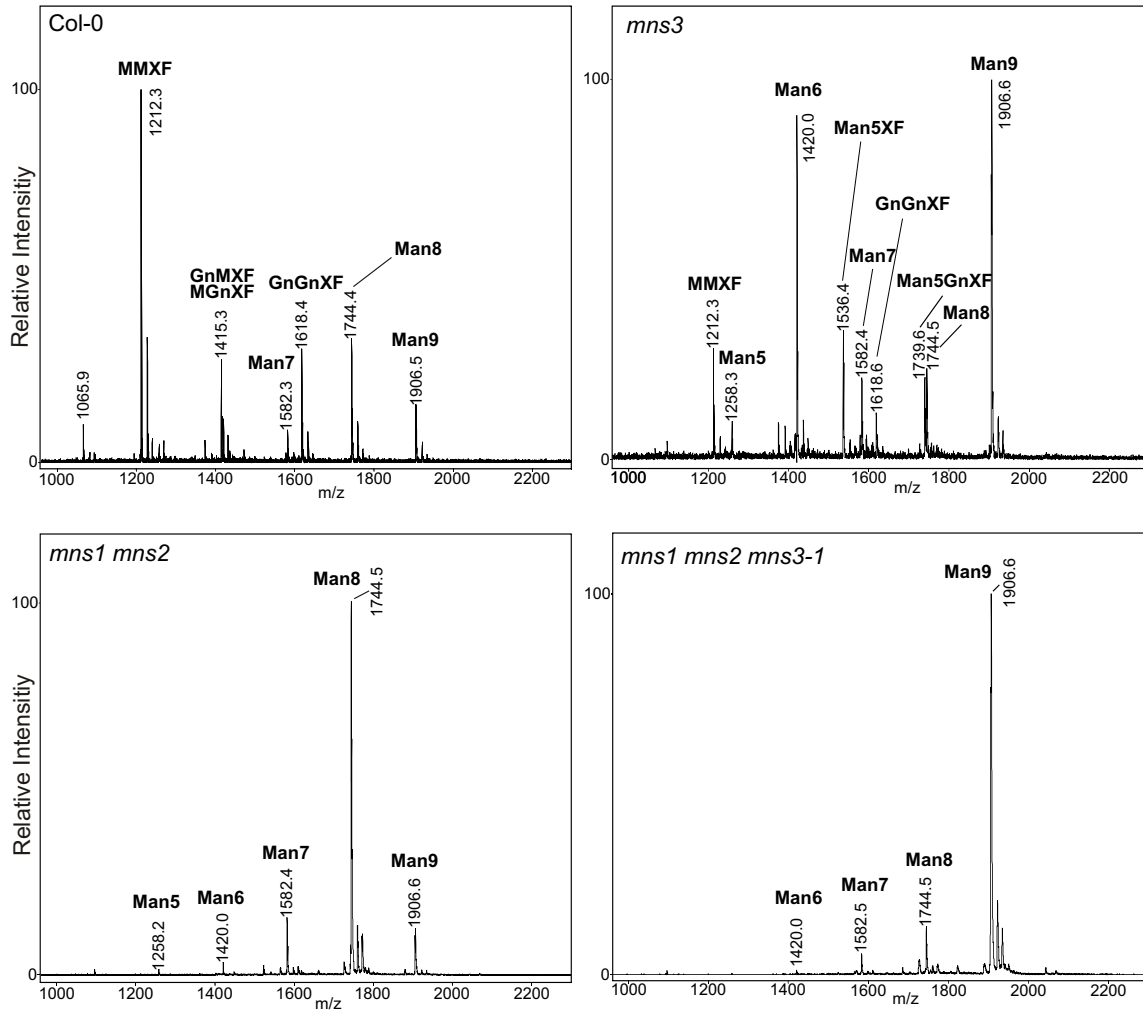

**Supplemental Figure 14. N-glycan spectra of roots of wild-type (Col-0), *mns3-1*, *mns1 mns2* and *mns1 mns2 mns3-1* plants.**

Total N-glycans extracted from 500 mg roots of wild-type plants and the *mns* mutants were analyzed by MALDI-TOF-MS. N-glycan patterns are similar to those obtained from leaves in *mns1 mns2* and *mns1 mns2 mns3-1*. An increase in Man<sub>9</sub>GlcNAc<sub>2</sub> was found in roots of *mns3-1*, which was not present in leaves.



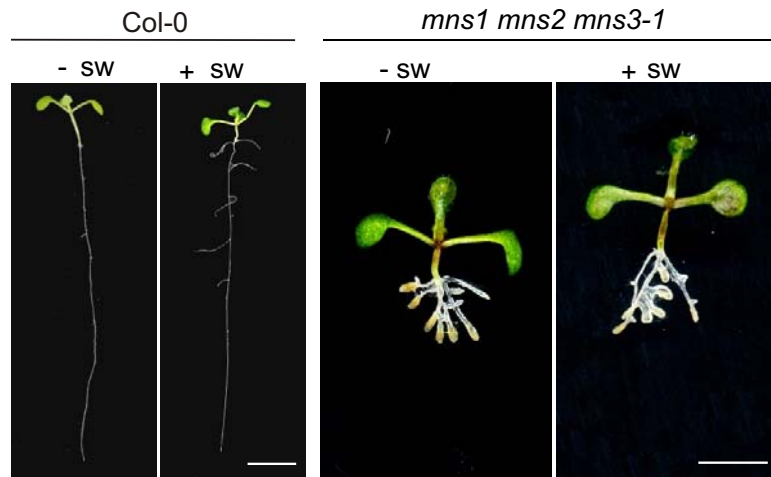

**Supplemental Figure 15. Swainsonine has no effect on Col-0 wild-type and *mns1 mns2 mns3-1*.**

Col-0 and *mns1 mns2 mns3-1* were grown on MS medium plus 2% sucrose and 100  $\mu$ M swainsonine for seven days at 22°C. Seedlings do not show any obvious root phenotype when grown on agar plates containing the class II  $\alpha$ -mannosidase inhibitor swainsonine. Scale bar = 5 mm.

**Supplemental Table 1. Pairwise BLAST alignment of amino acid sequences (see Supplemental Data Set 1). (<http://www.ncbi.nlm.nih.gov/BLAST/bl2seq/wblast2.cgi>).**  
Identity values (%) are shown.

|           | At MNS1 | At MNS2 | At MNS3 | At MNS4 | At MNS5 |
|-----------|---------|---------|---------|---------|---------|
| At MNS1   | -       | 82      | 43      | 30      | 30      |
| At MNS2   |         | -       | 43      | 30      | 29      |
| At MNS3   |         |         | -       | 30      | 29      |
| At MNS4   |         |         |         | -       | 48      |
| At MNS5   |         |         |         |         | -       |
| Gm MNSI   | 75      | 73      | 42      | 34      | 32      |
| Hs ERMNSI | 45      | 44      | 44      | 30      | 31      |
| Hs MNSIA  | 42      | 42      | 35      | 30      | 33      |
| Hs MNSIB  | 44      | 41      | 35      | 30      | 30      |
| Hs MNSIC  | 44      | 42      | 35      | 30      | 29      |
| Hs EDEM1  | 30      | 29      | 30      | 47      | 44      |
| Hs EDEM2  | 32      | 33      | 35      | 46      | 42      |
| Hs EDEM3  | 31      | 31      | 28      | 43      | 43      |
| Sc MNS1   | 38      | 36      | 40      | 27      | 28      |
| Sc HTM1   | 27      | 27      | 26      | 37      | 34      |

**Supplemental Table 2. Predictions of subcellular localization, number of trans-membrane domains (TMDs), signal anchor or peptide probability and calculation of molecular masses (MW) and isoelectric points (PI).**

|         | Gene ID   | Putative subcellular localization <sup>ab,c</sup> | TMD prediction <sup>d,e</sup> | Signal anchor Probability <sup>f</sup> | Signal peptide Probability <sup>f</sup> | MW <sup>g</sup> | PI <sup>h</sup> |
|---------|-----------|---------------------------------------------------|-------------------------------|----------------------------------------|-----------------------------------------|-----------------|-----------------|
| At MNS1 | At1g51590 | SP                                                | 1                             | 0.989                                  | 0.010                                   | 63533.0         | 6.4             |
| At MNS2 | At3g21160 | SP                                                | 1                             | 0.976                                  | 0.023                                   | 65137.0         | 6.4             |
| At MNS3 | At1g30000 | SP                                                | 1                             | 0.993                                  | 0.000                                   | 69070.0         | 7.1             |
| At MNS4 | At5g43710 | SP                                                | 1                             | 0.062                                  | 0.936                                   | 70096.0         | 4.6             |
| At MNS5 | At1g27520 | SP                                                | 0                             | 0.421                                  | 0.578                                   | 65708.0         | 6.4             |

The predictions and calculations were performed using the following programs: a) <http://www.cbs.dtu.dk/services/TargetP/>; (SP = secretory pathway); b) <http://urgi.versailles.inra.fr/predotar/predotar.html>; c) <http://hc.ims.u-tokyo.ac.jp/iPSORT/>; d) <http://www.enzim.hu/hmmtop/>; e) <http://www.cbs.dtu.dk/services/TMHMM-2.0/>; <http://www.cbs.dtu.dk/services/SignalP/>; f) <http://www.arabidopsis.org/>; g + h) <http://www.arabidopsis.org/>, calculated MW (g) and (h) PI.

**Supplemental Table 3. Primer sequences cited in Methods.** Underlined regions represent restriction sites.

| Name          | Sequence (5' - 3')                              |
|---------------|-------------------------------------------------|
| At1g51590_1F  | TGGGTGCAAGGGAACAAAACATC                         |
| At1g51590_2R  | TTGAAAACCCACTCGTCTAATGAAATAAC                   |
| At1g51590_3F  | CTGTTTTTGTGAGTGGGTTGAGAAGAGA                    |
| At1g51590_7R  | CAAATTCATTTGAGCAGAAACTGTCT                      |
| At1g51590_8R  | <u>AGGATCCG</u> GCATCCTTCAGAGTCTTCAAAG          |
| At1g51590_9F  | <u>TTCTAGAG</u> ATGGCGAGAAGTAGATCGATTA          |
| At1g51590_10R | TAT <u>AGGTAC</u> CTACCTAAACGTTAATCTGATGACCAA   |
| At1g51590_11F | TAT <u>AGCGCCG</u> CCCGAGAACATGAGGTTGAAGTTT     |
| At1g51590_15R | <u>TCCATGGC</u> TCTTCTCAACCCACTCAACAAA          |
| At1g51590_16F | TGTCGACGTTGCTTTTCATCAATCTACCTAATGA              |
| At3g21160_1F  | GAGCGTCACTGAGGATGTGTCTGTCAA                     |
| At3g21160_2R  | GTCTCAAACATACTGGCAGCATAATCCTT                   |
| At3g21160_3F  | GGTTTCAATTTCTTCTTCTCCTTTTTTC                    |
| At3g21160_4R  | AGCCCCTCCTACGAATCACACTG                         |
| At3g21160_7R  | <u>TGGATCCA</u> ACATCCTTCAAACACTATTGACAG        |
| At3g21160_8F  | <u>TTCTAGAG</u> ATGGCGAGGAATAAACTTGTA           |
| At3g21160_9F  | TAT <u>AGCGCCG</u> CCCGAGACTACCAGTTTGAAGTTTC    |
| At3g21160_10R | TAT <u>AGGTAC</u> CTTACTTCTTTGTTATCCGACCATAA    |
| At3g21160_12F | TATATCT <u>AGAAT</u> GTGCGAAATCTCTACCATATTCAG   |
| At3g21160_13R | TAT <u>AGGATC</u> CTTACTTCTTTGTTATCCGACCAT      |
| At3g21160_14F | <u>TGTCGACA</u> ATTTTCAAAGAATCAAGATGGAGAGA      |
| At3g21160_15R | <u>TACATGT</u> CAATTCCGACGATCAGATCTGATCTCG      |
| At1g30000_2R  | TAACTCCCCTACAAAGACCAGACCT                       |
| At1g30000_3F  | GGCTTCCACCTCGTTTATCACCT                         |
| At1g30000_5F  | <u>TTCTAGA</u> ATGTGCGAAATCTCTACCATATTCAG       |
| At1g30000_6R  | <u>TGGATCCT</u> CTTAATTGTCCTTCGTCAGGTGA         |
| At1g30000_8F  | TAT <u>AGCGCCG</u> CCCGGTCTTAATGAGAAAGGAAAGG    |
| At1g30000_9R  | TAT <u>AGGTAC</u> CTCAGGTGTTTCTTCTTATTGGT       |
| At1g30000_10R | <u>TGGATCC</u> GGTGTCTTCTTATTGGTAA              |
| At1g30000_11R | TAT <u>AGGATC</u> CTCAGGTGTTTCTTCTTATTGGT       |
| At1g30000_12F | TATATCT <u>AGAAT</u> GTGCGAAATCTCTACCATATTCAG   |
| At1g30000_14F | TAT <u>AGTCGAC</u> TCTTTACATTGGACGAGTACAAGGAGGA |
| At1g30000_15R | TAT <u>ACCATGG</u> TCAGATCCCCCGTTCTAATTGAAG     |
| LBa1          | TGGTTCACGTAGTGGGCCATCG                          |
| UBQ_5D        | AACCCTTGAGGTTGAATCATC                           |
| UBQ_5U        | CTCCTTCTTTCTGGTAAACGT                           |

## Supplemental Methods

### Promoter-GUS Fusions

To generate the promoter GUS expression vector pPZP230-GUS the hygromycin expression cassette was amplified from pGreen0129 (Hellens et al., 2000) using primers nos-1/-2 and cloned into the *KpnI* and *BamHI* sites of the binary vector pPZP200 (Hajdukiewicz et al., 1994). Subsequently an *NcoI* linker was inserted into the *SalI* and *HindIII* sites of pPZP230 and the 2 kb uidA-gene fragment containing the CaMV terminator was removed from pSH4 (Holtorf et al., 1995, kindly provided by Holger Bohlmann) and ligated into *NcoI* and *HindIII* sites. For promoter GUS fusions, genomic fragments comprising 1042 bp of 5' flanking DNA of MNS1, 1621 bp of MNS2 or 873 bp of MNS3 were amplified from wild-type genomic DNA using primers At1g51590-16F/-15R, At3g21160-14F/-15R and At1g30000-14F/-15R and cloned into the *SalI* and *NcoI* sites of pPZP230-GUS. Col-0 plants were transformed by *Agrobacterium tumefaciens* (strain: UIA143) carrying the GUS expression constructs by the floral dip procedure. Transgenic plants were selected on MS medium containing 20 mg/l hygromycin. Plant material was stained for GUS activity in 0.5 mg/ml X-Gluc in 50 mM NaHPO<sub>4</sub> (pH 7.0), 10 mM EDTA, 0.1% Triton X-100 for 18 h at 37°C. After clearing in three changes of 70% ethanol, the plant material was mounted in water. Imaging was done using a Leica MZ FLIII stereomicroscope (Leica, Wetzlar, Germany), equipped with a Leica DC 500 digital camera.

### References:

- Hajdukiewicz P, Svab Z, Maliga P (1994) The small, versatile pPZP family of *Agrobacterium* binary vectors for plant transformation. *Plant Mol Biol* **25**: 989-994.
- Hellens R, Edwards E, Leyland N, Bean S, Mullineaux P (2000) pGreen: a versatile and flexible binary Ti vector for *Agrobacterium*-mediated plant transformation. *Plant Mol Biol* **42**: 819-832.
- Holtorf S, Apel K, Bohlmann H (1995) Comparison of different constitutive and inducible promoters for the overexpression of transgenes in *Arabidopsis thaliana*. *Plant Mol Biol* **29**: 637-646.
- Neeser, J.-R., Del Vedov, S., Mutsaers, J.H.G.M., and Vliegenthart, J.F.G. (1985). Structural Analysis of the carbohydrate chains of legume storage proteins by 500-MHz <sup>1</sup>H-NMR spectroscopy. *Glycoconj. J.* **2**: 355-364.
- Tomiya, N., Lee, Y., Yoshida, T., Wada, Y., Awaya, J., Kurono, M., and Takahashi, N. (1991). Calculated two-dimensional sugar map of pyridylaminated oligosaccharides: elucidation of the jack bean alpha-mannosidase digestion pathway of Man<sub>9</sub>GlcNAc<sub>2</sub>. *Anal. Biochem.* **193**: 90-100.
- Strasser, R., Altmann, F., Mach, L., Glössl, J., and Steinkellner, H. (2004). Generation of *Arabidopsis thaliana* plants with complex N-glycans lacking beta1,2-linked xylose and core alpha1,3-linked fucose. *FEBS Lett.* **561**: 132-136.
